# Supplementary material
Source: publisher figshare collection journal article supplement (https://frontiersin.figshare.com/ndownloader/files/26335651)
Supplement: Supplementary file 1 [file 26335651]

# Supplementary Information

# Appendix 1: Questionnaire – Home Tasting

Household number (if applicable)……………………………………..

Name of participant: …………………………………………………..

Date of birth: …………………………………………………………..

Gender: ………………………………………………………………...

**Instructions**

Please taste each sample and answer the questions below. (use a tick or X)

1.Which sweetpotato is the **best** according to you?

Code A………… Code B…………. Code C…………..

What **attributes** of the sweetpotato make it the best?

Colour/Appearance………………. Taste ………………….

Other (please specify) ………………………………………

In your own words, **describe the taste** of the sweetpotato

………………………………………………………………………………………………………………………………………………………………………………………………………………

2. Which sweetpotato is the **worst** according to you?

Code A………… Code B…………. Code C…………..

What **attributes** of the sweetpotato make it the worst?

Colour/Appearance………………. Taste ………………….

Other (please specify) ………………………………………

In your own words, **describe the taste** of the sweetpotato

………………………………………………………………………………………………………………………………………………………………………………………………………………

#

# Appendix 2: Questionnaire – Community Tasting

Household number (if applicable)……………………………………..

Name of participant: …………………………………………………..

Date of birth: ………………………………………………………….

Gender: ………………………………………………………………..

**Instructions**

Please taste each sample and answer the questions below. (use a tick or X)

1.Which sweetpotato is the **best** according to you?

Code A………… Code B…………. Code C…………..

What **attributes** of the sweetpotato make it the best?

Colour/Appearance………………. Taste ………………….

Other (please specify)……………………………………….

In your own words, **describe the taste** of the sweetpotato

………………………………………………………………………………………………………………………………………………………………………………………………………………

2. Which sweetpotato is the **worst** according to you?

Code A………… Code B…………. Code C…………..

What **attributes** of the sweetpotato make it the worst?

Colour/Appearance………………. Taste ………………….

Other (please specify) ………………………………………

In your own words, **describe the taste** of the sweetpotato

………………………………………………………………………………………………………………………………………………………………………………………………………………

3. Which **cooking method** do you commonly use for sweetpotato in your household?

Boiling ……………… Steaming ……………….. Frying………………… Baking……………….. Other ………………………….

4. Do you **plant** sweetpotato in your field?

Yes ……………. No……………………

If yes, **how many varieties** do you plant per growing season?

One …………… Two………………. Three…………….. More than 3 …………………………

Which factors influenced your **choice of variety planted**? (tick all applicable)

Availability of planting material ………………………….

Taste of the roots ………………………………………….

Duration to maturity ………………………. Cooking time ……………………………….

Colour of the roots ………………………. Market for selling surplus………………………

Other (please specify) ……………………………………………………………………………..

5. Do you **purchase** sweetpotato from the market?

Yes………… No……… Sometimes ………

**If yes**, what criteria do you use to choose the variety purchased?

Price…………………. Size of root……………….. Colour of root…………………. Familiarity…………… Vendor…………….

Other (please specify)……………………………………………………………………………….

6. How do you handle **surplus** produce?

………………………………………………………………………………………………………………………………………………………………………………………………………………

7. Do you **store** sweetpotato roots for long before consumption?

Yes ……………………….

Please state longest storage duration…………………………………

Method of storage……………………………………………………………

No…………………………..
